# Supplementary material
Source: PubMed Central journal article supplement (PMC3259886)

# The fungal phytochrome FphA from *Aspergillus nidulans*

Sonja Brandt<sup>1</sup>, David von Stetten<sup>2</sup>, Mina Günther<sup>2</sup>, Peter Hildebrandt<sup>2</sup>, Nicole Frankenberg-Dinkel<sup>1,\*</sup>

<sup>1</sup> Physiologie der Mikroorganismen, Ruhr-Universität Bochum, Universitätsstr. 150, D-44780 Bochum, Germany.

<sup>2</sup> Technische Universität Berlin, Institut für Chemie, Sekr. PC14, Straße des 17. Juni 135, D-10623 Berlin, Germany.

## SUPPLEMENTAL FIGURES

**Figure S1. RR spectra of FphAN753 in the meta-Rc state in comparison to DrBphP.** FphAN753 (top – abbreviated as FphA) and DrBphP were trapped in the meta-Rc state at -30°C during irradiation with red light. The spectra display the marker band region (1500-1700 cm<sup>-1</sup>) from samples dissolved in H<sub>2</sub>O and D<sub>2</sub>O. The spectra of DrBphP were taken from ref. 19.

**Figure S2. Absorbance spectra of FphAN753\_H504A-BV and BV control sample.** Absorbance spectra of 10 μM apo-FphAN753\_H504A after incubation with 20 μM BV for 30 min in the dark (solid line) and 20 μM BV in EW buffer (dotted line).

Figure S 1. Brandt, S *et al.*

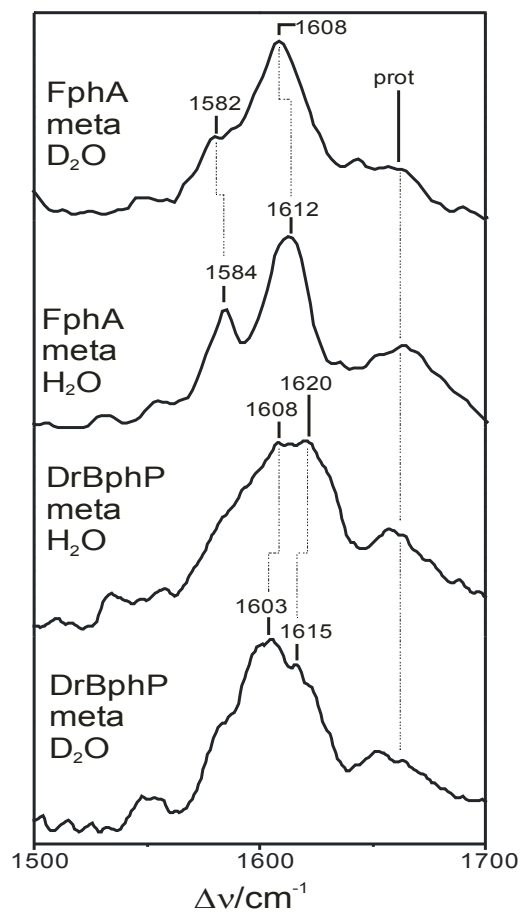

Figure S 2. Brandt, S *et al.*

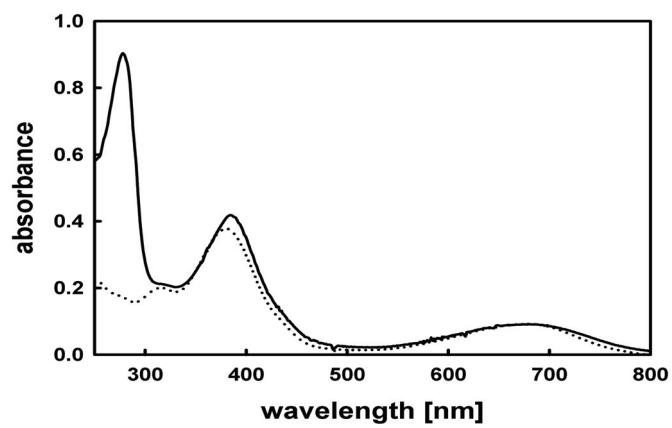

Supplement: M805506200_1.pdf [file M805506200_1.pdf]
